# Supplementary material for: The Market Dynamics of Generic Medicines in the Private Sector of 19 Low and Middle Income Countries between 2001 and 2011: A Descriptive Time Series Analysis
Source: PLoS One. 2013 Sep 30;8(9):e74399. doi: 10.1371/journal.pone.0074399 (PMC3787029; doi:10.1371/journal.pone.0074399)
Supplement: Annex S1 — (XLSX) [file pone.0074399.s001.xlsx]

## Sheet: Table AnnexS1
Therapeutic group	ATC 1	ATC full	Number of countries	top 30 of Originator and Licensed (O+L)	O+L to generic Switch? Ratio greater than 1	Taken off market ?
Antibiotics	J01	J01CA04	8	AMOXICILLIN	Yes, Colombia
PSYCHOLEPTICS	N05	N05BA12	8	ALPRAZOLAM	NO
PSYCHOLEPTICS	N05	N05BA08	8	BROMAZEPAM	NO
ANTIINFLAMMATORY AND ANTIRHEUMATIC PRODUCTS	M01	M01AB05	8	DICLOFENAC	Colombia, Uruguay, South Africa
DRUGS USED IN DIABETES	A10	A10BB01	8	GLIBENCLAMIDE	Venezuela
Antibiotics	J01	J01EE01	8	SULFAMETHOXAZOLE#TRIMETHOPRIM	NO
ANTIHISTAMINES FOR SYSTEMIC USE	R06	R06AX13	6	LORATADINE	South Africa, Ecuador, Venezuela
COUGH AND COLD PREPARATIONS	R05	R05CB02	6	BROMHEXINE	Venezuela
ANTIEPILEPTICS	N03	N03AF01	6	CARBAMAZEPINE	NO
ANTIHISTAMINES FOR SYSTEMIC USE	R06	R06AA02	5	DIPHENHYDRAMINE	NO
ANTIEPILEPTICS	N03	N03AB02	5	PHENYTOIN	NO
ANTIINFLAMMATORY AND ANTIRHEUMATIC PRODUCTS	M01	M01AH02	5	ROFECOXIB	NO	Taken off market in US, S Africa, Venezuela
AGENTS ACTING ON THE RENIN-ANGIOTENSIN SYSTEM	C09	C09AA02	5	ENALAPRIL	Ecuador, South Africa
PSYCHOLEPTICS	N05	N05BA06	5	LORAZEPAM	NO	Taken off the market in Venezuela
DRUGS FOR OBSTRUCTIVE AIRWAY DISEASES	R03	R03AC02	5	SALBUTAMOL	NO
			4	LORATADINE#PSEUDOEPHEDRINE	NO
			4	AMITRIPTYLINE	Colombia	Taken off market in Jordan
			4	BIPERIDEN	NO
			4	CINNARIZINE	NO
			4	CLONAZEPAM	Uruguay	Taken off the market in Jordan
			4	DIAZEPAM	NO
			4	IBUPROFEN	Venezuela
			4	LOPERAMIDE	Philippines
			3	SIMVASTATIN	NO
			3	AMBROXOL	NO
			3	AMPICILLIN	NO
			3	ATENOLOL	Philippines
			3	BETAMETHASONE#DEXCHLORPHENIRAMINE	NO	Taken off market in Venezuela, Philippines
			3	CAPTOPRIL	NO
			3	CHLORPHENAMINE#PARACETAMOL#PSEUDOEPHEDRINE	NO
			3	ERYTHROMYCIN	NO
			3	METAMIZOLE SODIUM#SCOPOLAMINE BUTYL HYDROXIDE	NO	Taken off the market in Venezuela
			3	NAPROXEN	NO
			3	NIFEDIPINE	NO
			3	NIMESULIDE	Ecuador
			3	PROPRANOLOL	NO
			2	ACETYLSALICYLIC ACID#CHLORPHENAMINE#PSEUDOEPHEDRINE	NO	Taken off market in Peru and Mexico
			2	AMILORIDE#HYDROCHLOROTHIAZIDE	NO
			2	AMLODIPINE	NO
			2	ATORVASTATIN	NO
			2	CEFACLOR	Philippines
			2	CEFRADINE	NO
			2	CELECOXIB	NO	Taken off market in US and Venezuela
			2	CHLORPHENAMINE	Colombia
			2	CHLORPHENAMINE#PARACETAMOL#PHENYLPROPANOLAMINE	NO
			2	CHLORPROPAMIDE	NO
			2	CITALOPRAM	South Africa
			2	DEXTROMETHORPHAN#DIPHENHYDRAMINE	NO	Taken off the market in Peru and Ecuador
			2	DILTIAZEM	NO
			2	FEXOFENADINE	NO
			2	FUROSEMIDE	NO
			2	HALOPERIDOL	NO
			2	HYDROXYZINE	NO
			2	LANSOPRAZOLE	South Africa
			2	LISINOPRIL	South Africa
			2	METOPROLOL	Philippines
			2	METRONIDAZOLE	NO
			2	OMEPRAZOLE	South Africa
			2	ORLISTAT	Uruguay, Colombia
			2	PENICILLIN V	NO
			2	PSEUDOEPHEDRINE#TRIPROLIDINE	NO	Taken off the market in Mexico
			2	QUINAPRIL	NO
			2	RANITIDINE	NO
			2	TIBOLONE	NO
			2	TRIMEBUTINE	Colombia
Green: LMIC excluding the US
Orange: LMIC including the US
